# Supplementary material
Source: Springer Nature journal article supplement (https://www.springermedizin.de/resource/supplementary/13058_2009_2559_MOESM1_ESM.pdf/9701698)

(A)

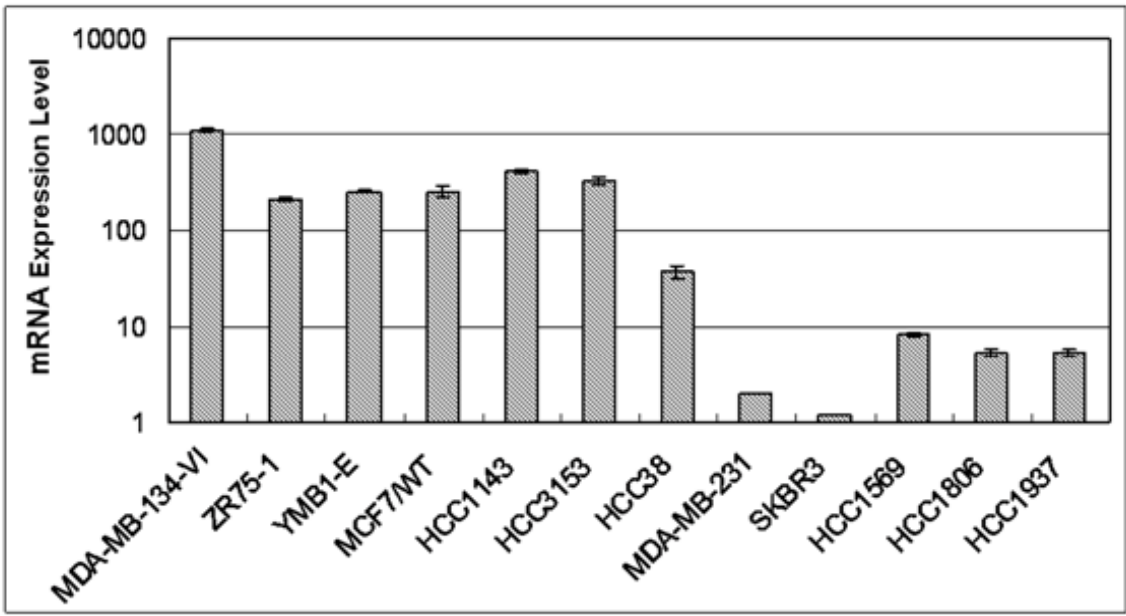

(B)

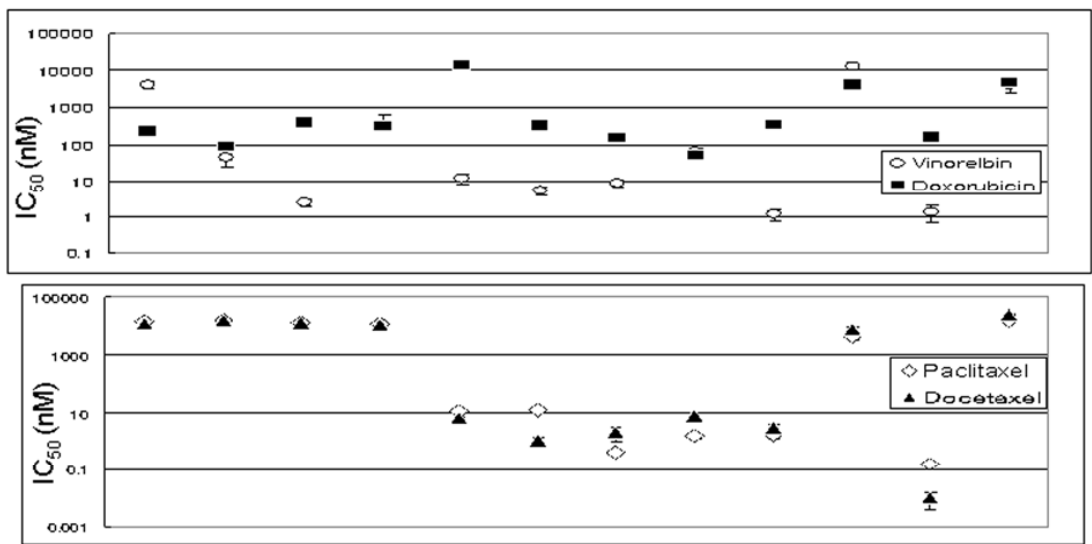

«Protein expression»

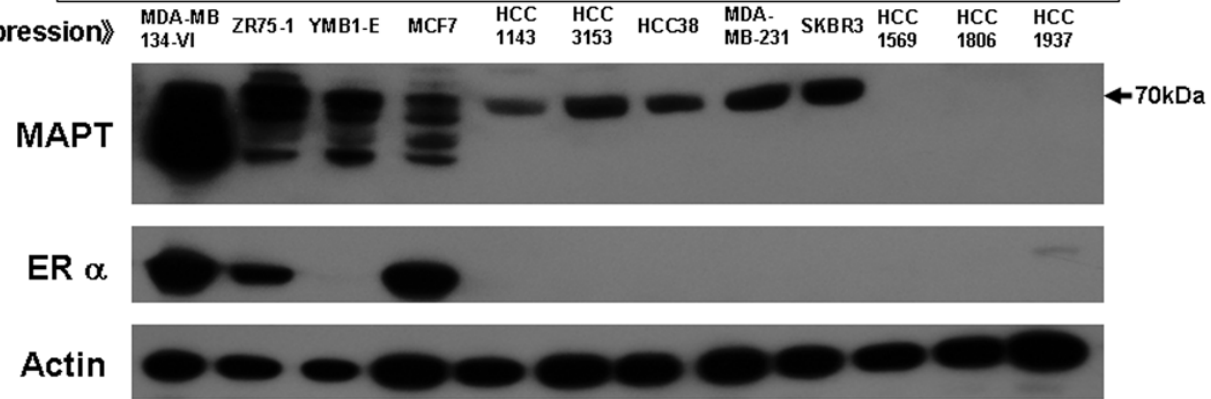

Supplement: MOESM1 [file 9701698]
